# Supplementary material for: Interleukin enhancer-binding factor 3 and HOXC8 co-activate cadherin 11 transcription to promote breast cancer cells proliferation and migration
Source: PubMed Central journal article supplement (PMC5746082; doi:10.18632/oncotarget.22491), 2017-11-18
Supplement: oncotarget-08-107477-s001.pdf [file oncotarget-08-107477-s001.pdf]

## Interleukin enhancer-binding factor 3 and HOXC8 co-activate cadherin 11 transcription to promote breast cancer cells proliferation and migration

### SUPPLEMENTARY MATERIALS

**Supplementary Table 1: Oligonucleotides used in real-time PCR, cloning and knockdown studies**

| Primer Name            | Sequence (5' to 3')                           |
|------------------------|-----------------------------------------------|
| CDH11 promoter cloning |                                               |
| Forward                | 5'-AAGCTAGCTCCAGTTCATATAAATGGCCATTTCATATA-3'  |
| Reverse                | 5'-AAGATATCGTCCCGGTCCCATTCAACAAGTCAGCGGCGG-3' |
| ChIP primers           |                                               |
| Forward-1              | 5'-TTAGAGCATTGTTGATTGC-3'                     |
| Reverse-1              | 5'-TATATGAACTGGAAAGGC-3'                      |
| Forward-2              | 5'-TTCTTCCCCTTTTATTGC-3'                      |
| Reverse-2              | 5'-CCATCAACTGGTGAGCAG-3'                      |
| Forward-3              | 5'-TGGGTATTTGTGTTGTTTC-3'                     |
| Reverse-3              | 5'-CCAGCAAGTTAGGATTCT-3'                      |
| Forward-4              | 5'-TGATTCAAGGTGTGTAGTG-3'                     |
| Reverse-4              | 5'-TTATCGAATCACAAACAGT-3'                     |
| Knockdown shRNA        |                                               |
| Scrambled shRNA        | 5'-CAACAAGATGAAGAGCACCAATT-3'                 |
| HOXC8 shRNA            | 5'-GCAATATCCCGACTGTAAATCTT-3'                 |
| ILF3 shRNA             | 5'-GTGCTGGTTCCAACAAAA-3'                      |
| NF 90 shRNA            | 5'-CAGACTGCTACGGCTATCA-3'                     |
| NF110 shRNA            | 5'-CTACGAGAGCAAATTCAAC-3'                     |
| mutagenesis            |                                               |
| Forward 1              | GACCTTGGGCTGGTTGGTTGGATATACTGT                |
| Reverse 1              | TGGATTAAGTGCAGGCCAAATCCCCAC                   |
| Forward 2              | CAGTTAATCCAACCTCTCTCTGCTTGCAGAAG              |
| Reverse 2              | AAGGGCCCTTTTGGTTACGTGGTAGGCACAGGAGAATG        |
| Real-time PCR          |                                               |
| Cadherin 11 forward    | 5'-GCATCCCGCCCATGAGTA-3'                      |
| Cadherin 11 reverse    | 5'-CGCACCCGCAGACTTTG-3'                       |
| ILF3 forward           | 5'-ACAGCAACGGGAAGATATCAC-3'                   |
| ILF3 reverse           | 5'-CCACTGGGTTTTTCATTCTTTGG-3'                 |
| $\beta$ -actin forward | 5'-TGGATCAGCAAGCAGGAGTATG-3'                  |
| $\beta$ -actin reverse | 5'-GCATTTGCGGTGGACGAT-3'                      |

**Supplementary Table 2: IHC staining of CDH11, ILF3 and HOXC8 expression**

|                     | Tumor tissues ( <i>n</i> = 38) | Normal tissues ( <i>n</i> = 10) | <i>P</i> -value |
|---------------------|--------------------------------|---------------------------------|-----------------|
| CDH11, <i>n</i> (%) |                                |                                 |                 |
| 0                   | 3 (7.9)                        | 7 (70)                          | < 0.0001        |
| +                   | 10 (26.3)                      | 3 (30)                          |                 |
| ++                  | 15 (39.5)                      | 0                               |                 |
| +++                 | 10 (26.3)                      | 0                               |                 |
| ILF3                |                                |                                 |                 |
| 0                   | 5 (13.2)                       | 4 (40)                          | 0.017           |
| +                   | 12 (31.6)                      | 4 (40)                          |                 |
| ++                  | 14 (36.8)                      | 2 (20)                          |                 |
| +++                 | 7 (18.4)                       | 0                               |                 |
| HOXC8               |                                |                                 |                 |
| 0                   | 5 (13.2)                       | 5 (50)                          | 0.004           |
| +                   | 10 (26.3)                      | 3 (30)                          |                 |
| ++                  | 12 (31.6)                      | 2 (20)                          |                 |
| +++                 | 11 (29)                        | 0                               |                 |

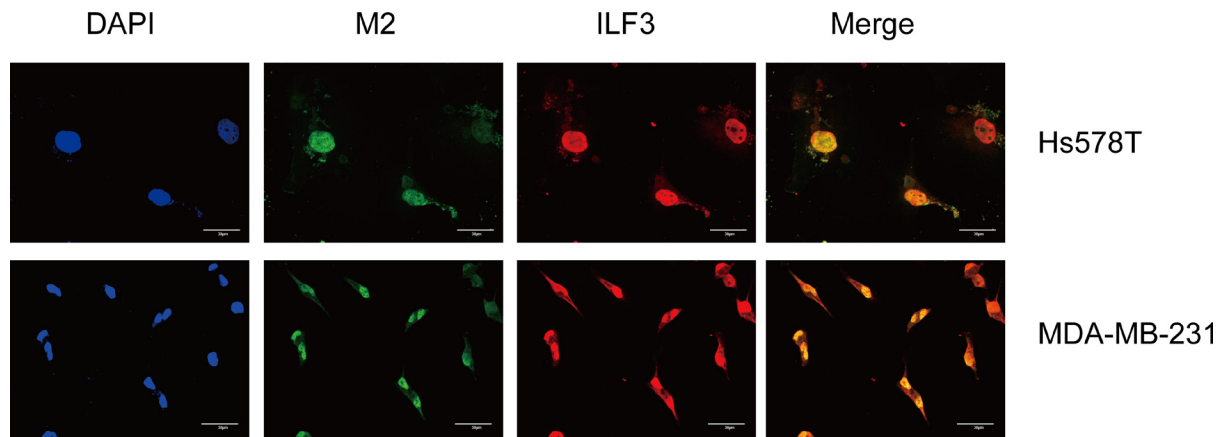

**Supplementary Figure 1: Co-localization of HOXC8 and ILF3 in Hs578T and MDA-MB-231 cells.** Immunofluorescence staining for HOXC8-flag (green) and ILF3 (red) in Hs578T or MDA-MB-231 cells lentivirally transduced with expression vectors encoding HOXC8-flag; DAPI staining for the nucleus. Magnification, 600 $\times$ ; Scale bar, 30  $\mu$ m.

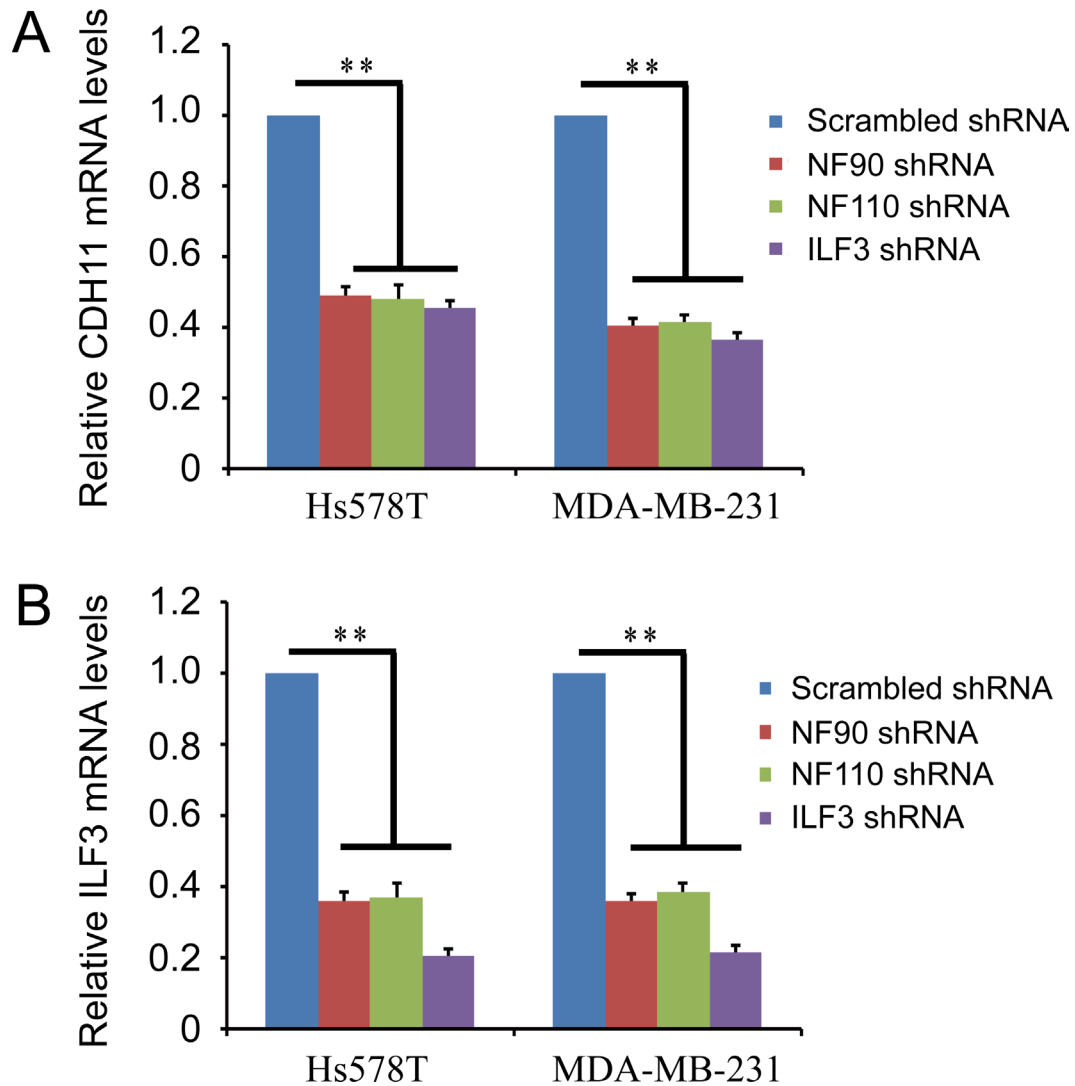

**Supplementary Figure 2: Depletion of NF90, NF110 or ILF3 results in reduction of CDH11 mRNA levels.** Hs578T or MDA-MB-231 cells were lentivirally transduced with NF90, NF110 or ILF3-specific shRNA, and total RNA was isolated and subjected to qRT-PCR to examine the level of CDH11 mRNA (A) or ILF3 mRNA (B).  $\beta$ -actin mRNA was used as an internal control for standardization. Each sample was run in triplicate and in multiple experiments for mean  $\pm$  SEM;  $**P < 0.01$ .

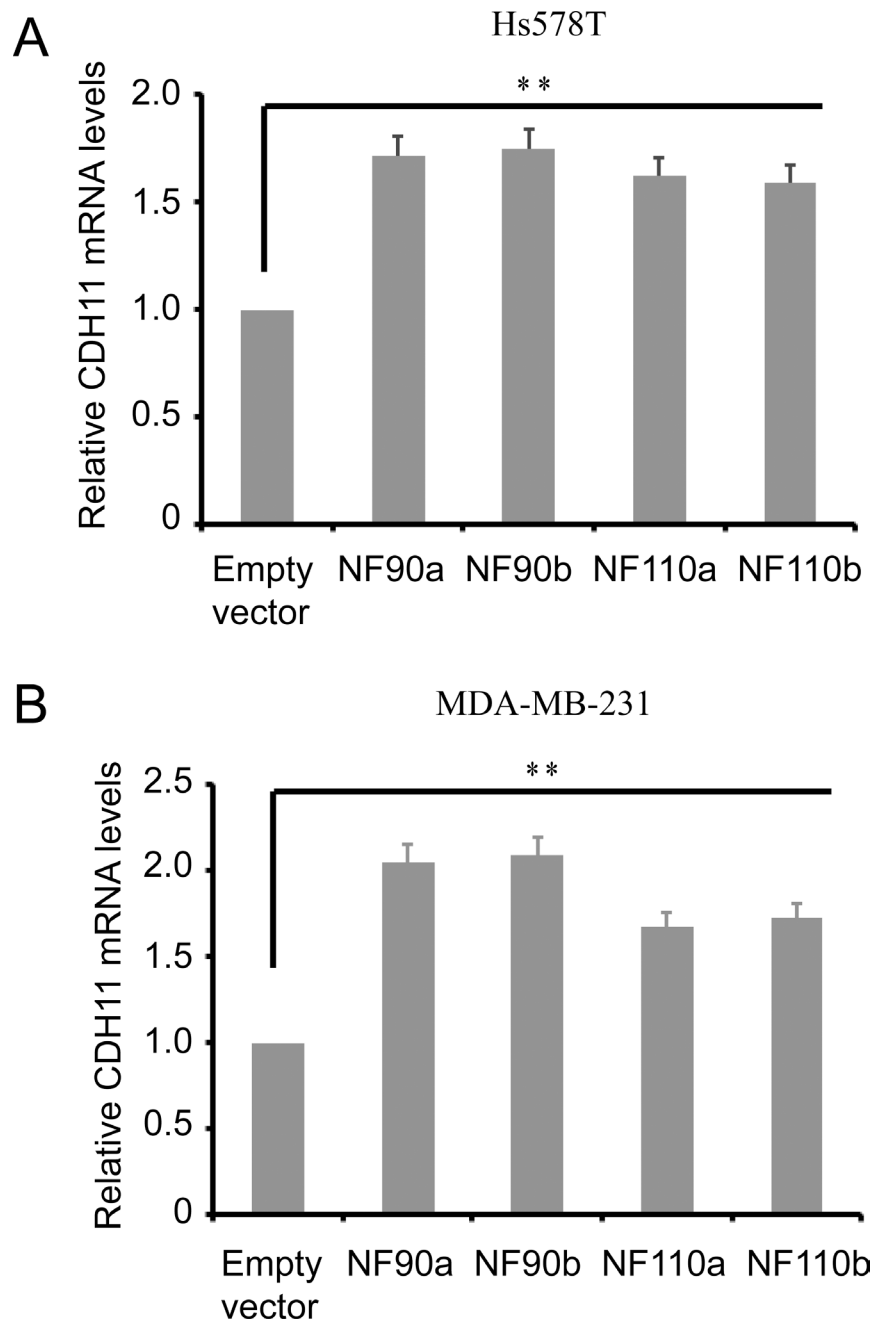

**Supplementary Figure 3: Ecto-expression of NF90a, NF90b, NF110a or NF110b increases CDH11 mRNA levels.** Hs578T or MDA-MB-231 cells were lentivirally transduced with NF90a, NF90b, NF110a or NF110b expression vectors, and qRT-PCR was performed to examine the levels of CDH11 mRNA.  $\beta$ -actin mRNA was used as an internal control for standardization. Each sample was run in triplicate and in multiple experiments for mean  $\pm$  SEM; \*\* $P < 0.01$ .

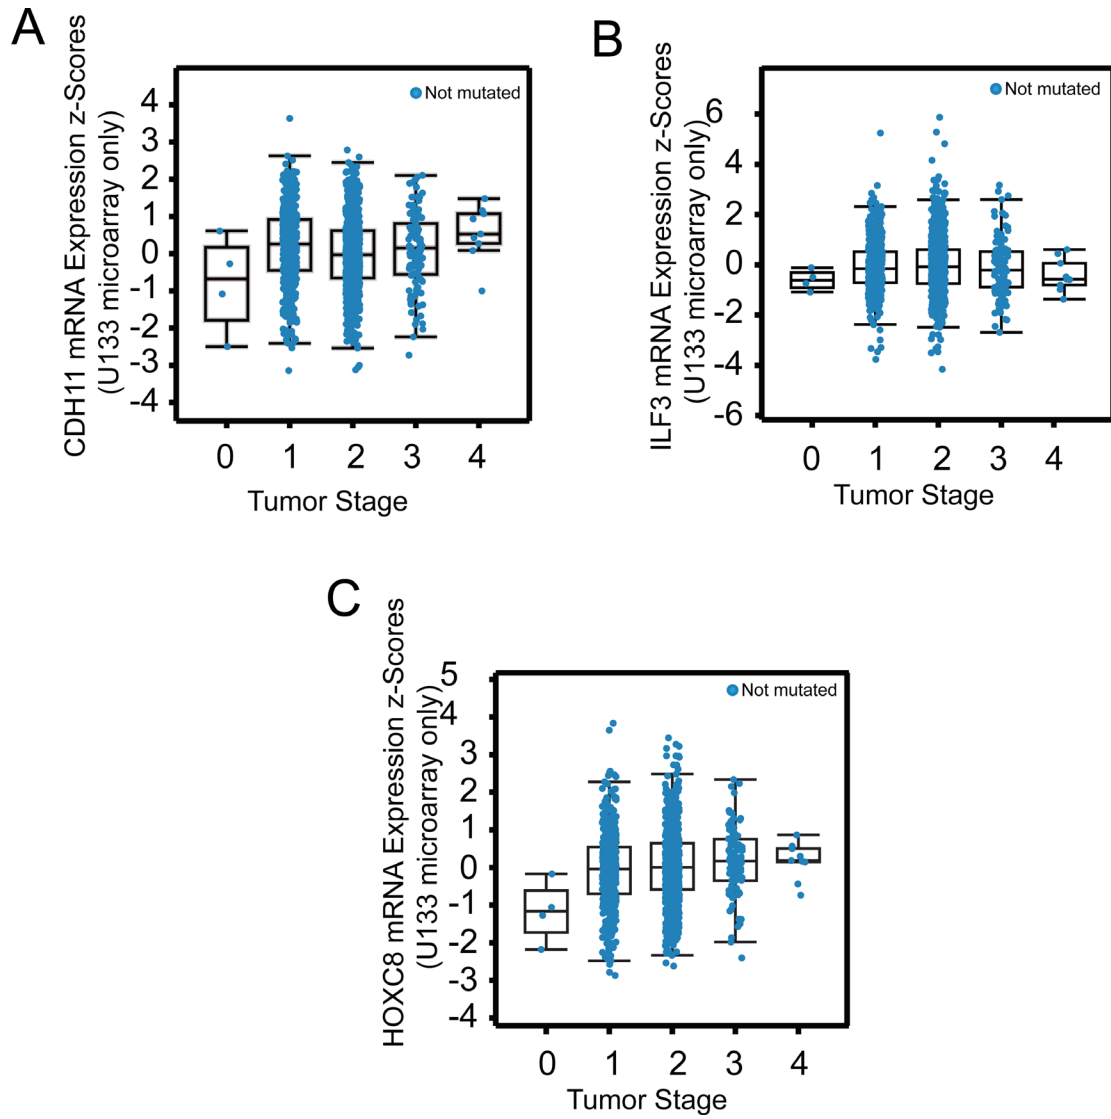

**Supplementary Figure 4: Meta-analysis of CDH11, ILF3 and HOXC8 mRNA levels using publicly available human cancer microarray datasets.** mRNA expression levels of CDH11 (A), ILF3 (B) and HOXC8 (C) at different stages of breast tumor specimen using breast cancer dataset (METABRIC, Nature 2012 & Nat Commun 2016, 2509 samples) from cBioPortal ([www.cbioportal.org](http://www.cbioportal.org)).

Expression of CDH11, ILF3 and HOXC8

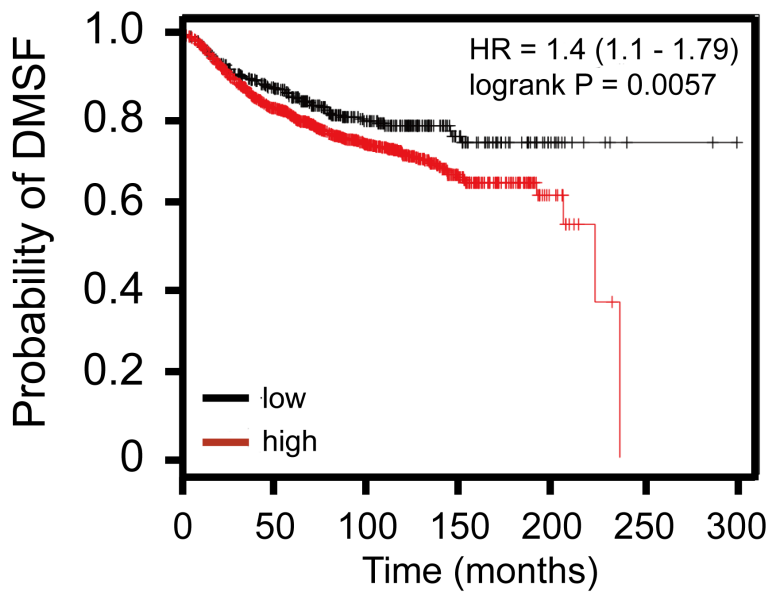

Number at risk

|       |      |     |     |     |    |   |   |
|-------|------|-----|-----|-----|----|---|---|
| low:  | 438  | 316 | 159 | 54  | 13 | 2 | 0 |
| high: | 1308 | 924 | 433 | 111 | 14 | 0 | 0 |

**Supplementary Figure 5: Association of CDH11, HOXC8 and ILF3 with DMSF in breast cancer patients.** The combined analyses of CDH11 + HOXC8 + ILF3 showed poor association for distant metastasis-free survival probability (DMSF). Data were analyzed using online survival analysis tool ([www.kmplot.com](http://www.kmplot.com)) (probe ID: 217804\_s\_at for ILF3, 207173\_x\_at for CDH11 and 221350\_at for HOXC8).
